# Supplementary material
Source: PubMed Central journal article supplement (PMC4076030)
Supplement: nn5015962_si_001.pdf [file nn5015962_si_001.pdf]

## Supporting Information

### **DNA Dendrimer: An Efficient Nanocarrier of Functional Nucleic Acids for Intracellular Molecular Sensing**

Hong-Min Meng, Xiaobing Zhang<sup>\*</sup>, Yifan Lv, Zilong Zhao, Nan-Nan Wang, Ting Fu, Huanhuan Fan, Hao Liang, Liping Qiu, Guizhi Zhu, and Weihong Tan<sup>\*</sup>

Molecular Sciences and Biomedicine Laboratory, State Key Laboratory for Chemo/Biosensing and Chemometrics, College of Chemistry and Chemical Engineering, College of Biology, Collaborative Innovation Center for Chemistry and Molecular Medicine, Hunan University, Changsha 410082, China

#### **Corresponding Authors**

[tan@chem.ufl.edu](mailto:tan@chem.ufl.edu); [xbzhang@hnu.edu.cn](mailto:xbzhang@hnu.edu.cn)

#### **ADDITIONAL EXPERIMENTAL DETAILS**

##### **Dynamic light scattering characterization of DNA dendrimer**

The hydrodynamic diameters of the DNA dendrimer under investigation were measured using a Zetasizer Nano ZS90 DLS system equipped with a red (633 nm) laser and an Avalanche photodiode

detector (APD) (quantum efficiency > 50% at 633 nm) (Malvern Instruments Ltd., Worcestershire, England). A Kuvetten cuvette (10 mm) was used as a sample container. DLS measurements were performed at room temperature at a fixed scattering angle of 90°.

### AFM imaging

Atomic force microscopy of samples was observed on a Multimode 8 (Bruker/USA) using ScanAsyst mode in ambient air. A 5 µL DNA sample was placed onto the surface of freshly cleaved mica and allowed to adsorb to the mica surface for approximately 30 minutes. The mica was then rinsed in Milli-Q water and dried with compressed air.

**Table S1.** Sequences of Oligonucleotides Used in This Work

| Oligonucleotide             | Sequences (from 5' to 3')                                   |
|-----------------------------|-------------------------------------------------------------|
| Y <sub>0a</sub>             | GAC CGA TGG ATG ACC TGT CTG CCT AAT GTG CGT CGT<br>AAG      |
| Y <sub>0b</sub>             | GAC CGA TGG ATG ACT TAC GAC GCA CAA GGA GAT CAT<br>GAG'     |
| Y <sub>0c</sub>             | GAC CGA TGG ATG ACT CAT GAT CTC CTT TAG GCA GAC<br>AGG      |
| Y <sub>1a</sub>             | GAA GCC ACT CTG ACC TGT CTG ACT AAT GTG CGT CGT<br>AAG      |
| Y <sub>1b</sub>             | GAA GCC ACT CTG ACT TAC GAC GCA CAA GGA GAT CAT<br>GAG-BHQ1 |
| Y <sub>1c-L-histidine</sub> | TCA TCC ATC GGT C CAC GTG CTC GT T AAC GGG GCT              |

|                               |                                                                                                          |
|-------------------------------|----------------------------------------------------------------------------------------------------------|
|                               | GTG CGG CTA GGA AGT A GGA GGA G CT CAT GAT CTC CT<br>T TAG TCA GAC AGG                                   |
| Y <sub>1c-L-histidine-R</sub> | TCA TCC ATC GGT CCA CGT GCT CGT GAA GTA GCG<br>CCG CCG TGG AGG AGC TCA TGA TCT CCT TTA GTC AGA<br>C AG G |
| X <sub>L-histidine(6)</sub>   | FAM-GTA AT rA GGA AGA GAT GAT GTG A                                                                      |
| X <sub>L-histidine(8)</sub>   | FAM-CTC CTC C rA GGA ACG AGC ACG TG                                                                      |
| Y <sub>1c-ATP (9)</sub>       | TCA TCC ATC GGT CCC CCC AGG TCT CAT GAT CTC CTT<br>TAG TCA GAC AGG                                       |
| Y <sub>1c-ATP (11)</sub>      | TCA TCC ATC GGT CTC CCC CAG GTC TCA TGA TCT CCT<br>TTA GTC AGA CAG G                                     |
| Y <sub>1c-ATP (12)</sub>      | TCA TCC ATC GGT CAC TCC CCC AGG TCT CAT GAT CTC<br>CTT TAG TCA GAC AGG                                   |
| Y <sub>1c-ATP (13)</sub>      | TCA TCC ATC GGT CTA CTC CCC CAG GTC TCA TGA TCT<br>CCT TTA GTC AGA CAG G                                 |
| X <sub>ATP</sub>              | FAM/Cy3-ACC TGG GGG AGT ATT GCG GAG GAA GGT                                                              |
| X <sub>ATP-R</sub>            | FAM-ACC TGG GGG AGT AAA AAA AAA AAA AAA                                                                  |
| Y <sub>2a</sub>               | CTG TCA TCG GTC ACC TGT CTG CCT AAT GTG CGT CGT<br>AAG                                                   |
| Y <sub>2b</sub>               | CTG TCA TCG GTC ACT TAC GAC GCA CAA GGA GAT CAT                                                          |

|                 |                                                          |
|-----------------|----------------------------------------------------------|
|                 | GAG                                                      |
| Y <sub>2c</sub> | TCA GAG TGG CTT CCT CAT GAT CTC CT T TAG GCA GAC<br>AGG' |
| Y <sub>3a</sub> | GAC ACA CTG AGG TCC TGT CTG CCT AAT GTG CGT CGT<br>AAG'  |
| Y <sub>3b</sub> | GAC ACA CTG AGG TCT TAC GAC GCA CAA GGA GAT CAT<br>GAG'  |
| Y <sub>3c</sub> | TGA CCG ATG ACA GCT CAT GAT CTC CTT TAG GCA GAC<br>AGG'  |
| Y <sub>4a</sub> | TGC TGT CTG TCC ACC TGT CTG CCT AAT GTG CGT CGT<br>AAG'  |
| Y <sub>4b</sub> | TGC TGT CTG TCC ACT TAC GAC GCA CAA GGA GAT CAT<br>GAG   |
| Y <sub>4c</sub> | ACC TCA GTG TGT CCT CAT GAT CTC CT T TAG GCA GAC<br>AGG  |

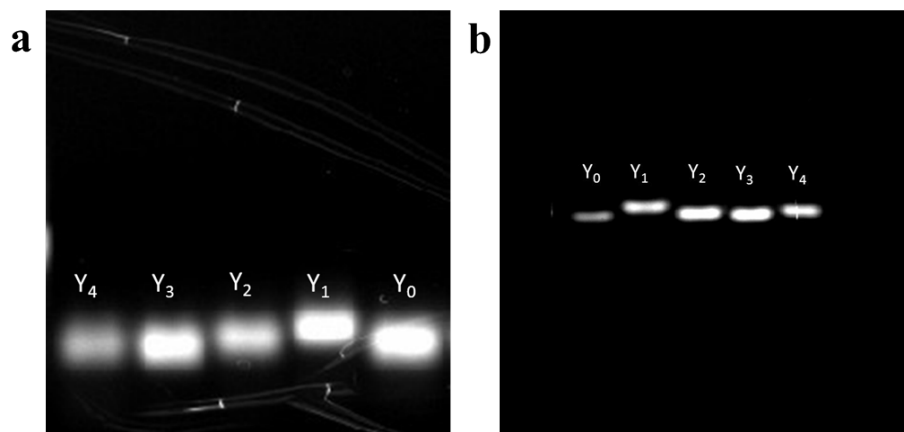

**Figure S1.** Agarose gel electrophoresis of  $Y_0$ – $Y_4$ , (a)  $Y_{-L}\text{-histidine}$ , (b)  $Y_{-ATP}$ .

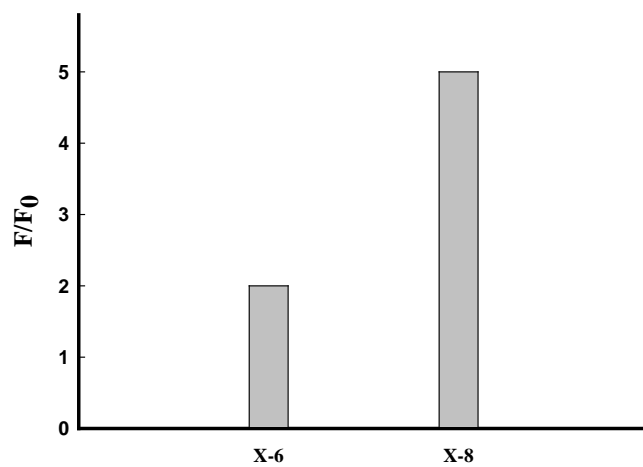

**Figure S2.** The fluorescent signal-enhanced ratio of  $G_{4-L}\text{-histidine}$  with substrate strand X containing a different number of bases. The concentration of  $G_{4-L}\text{-histidine}$  was fixed at 10 nM. The X-6 and X-8 denote FAM-labeled ssDNA containing 6 and 8 bases, respectively.

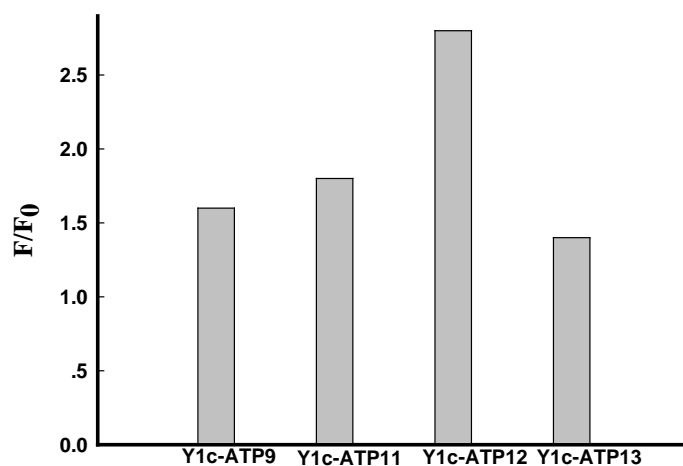

**Figure S3.** Comparison of the fluorescent signal-enhanced ratio of  $G_{4-ATP}$  with  $Y_{1c-ATP}$  containing a different number of bases. The concentration of  $G_{4-ATP}$  was fixed at 10 nM. The  $Y_{1c-ATP9}$ ,  $Y_{1c-ATP11}$ ,  $Y_{1c-ATP12}$ , and  $Y_{1c-ATP13}$  denote FAM-labeled ssDNA containing 9, 11, 12, and 13 bases, respectively.

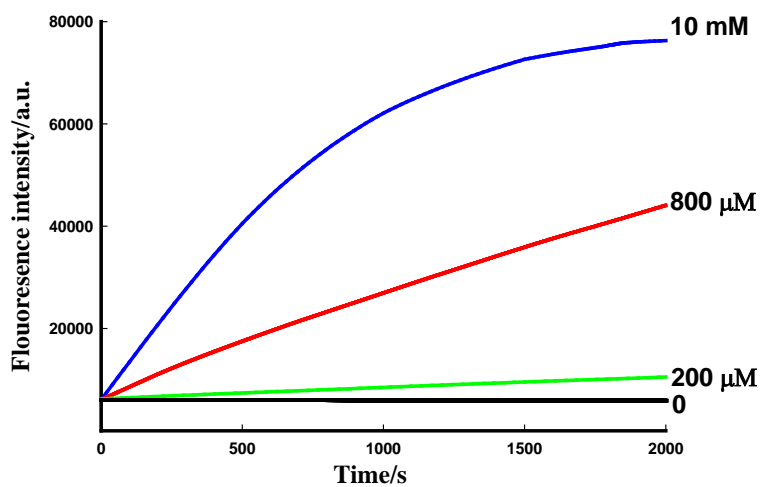

**Figure S4.** Time-dependent fluorescence response with low, intermediate, and high concentrations of L-histidine, the concentration for  $G_{4-L-histidine}$  is 10 nM.

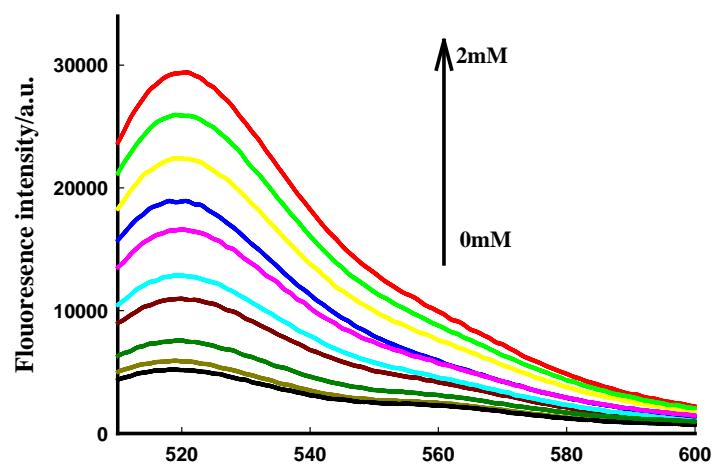

**Figure S5.** The fluorescence emission spectra of the sensing system upon the addition of ATP at different concentrations.

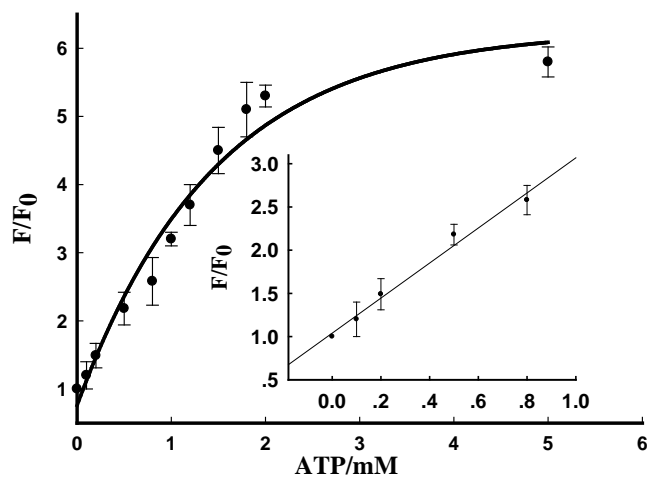

**Figure S6.** Change in fluorescence intensity based on different concentrations of ATP. Inset shows the responses of sensing system to ATP at low concentration.

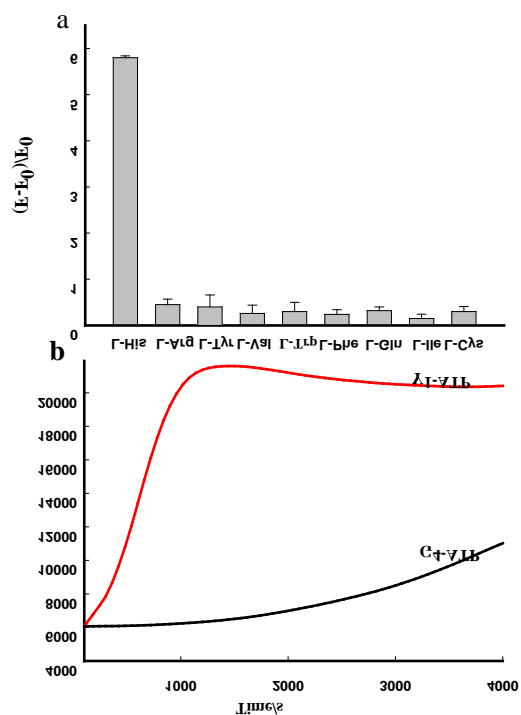

**Figure S7.** a). Selectivity of the DNase I-based assay for L-histidine over other potential interferences; the concentration for  $G_{4-L-histidine}$  is 10 nM. b). Fluorescence kinetics spectroscopy of  $G_{4-ATP}$  and  $Y_{1-ATP}$  treated with 1U/mL DNase I.

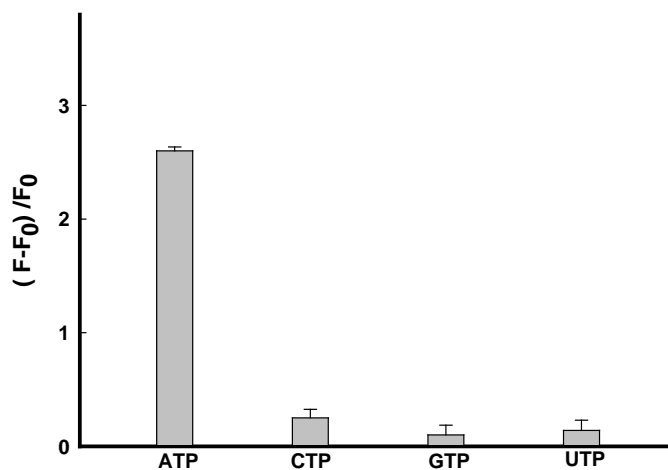

**Figure S8.** Selectivity of the aptamer-based assay for ATP compared to its analogues. The concentration for  $G_{4-ATP}$  is 10 nM.  $F_0$  and  $F$  are the fluorescence intensity of the sensor in the absence and presence of target, respectively.



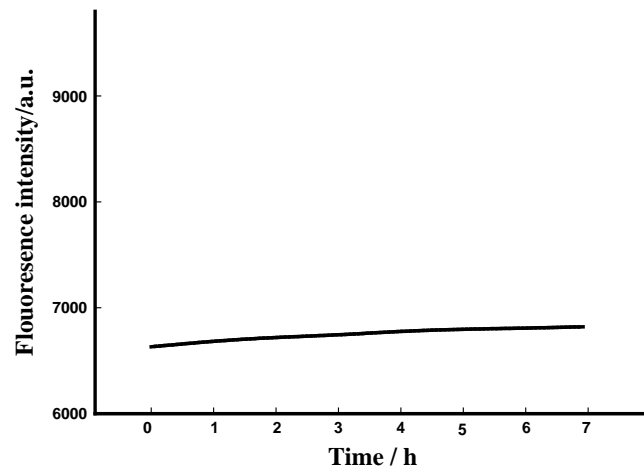

Figure S9. Fluorescence kinetics spectroscopy of G<sub>4</sub>-ATP treated with more than 5-hour incubation in cell lysate.

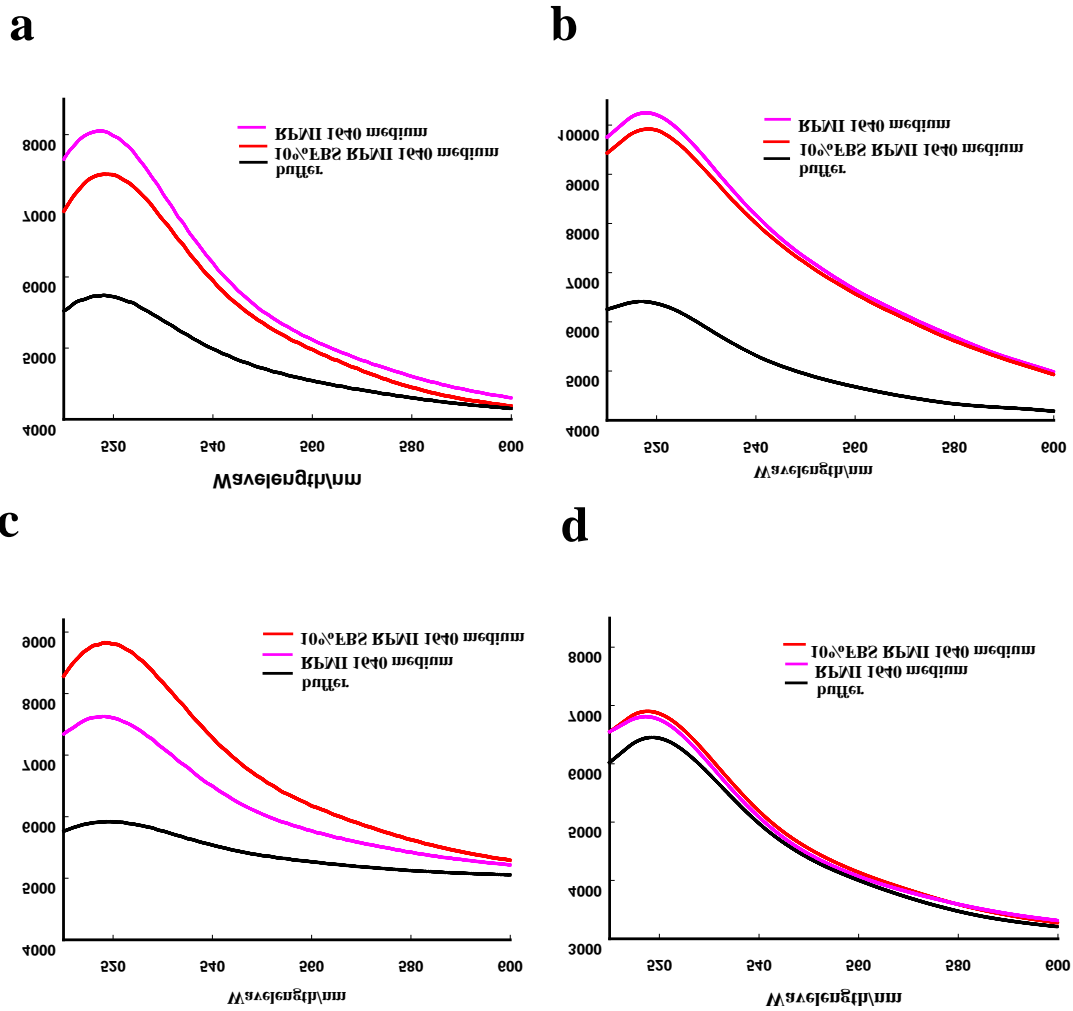

**Figure S10.** Fluorescence spectroscopy of a, Y<sub>1</sub>-L-histidine, b, G<sub>4</sub>-L-histidine, c, Y<sub>1</sub>-ATP, and d, G<sub>4</sub>-ATP treated with buffer, RPMI 1640 medium, and 10% FBS RPMI 1640 medium, respectively.

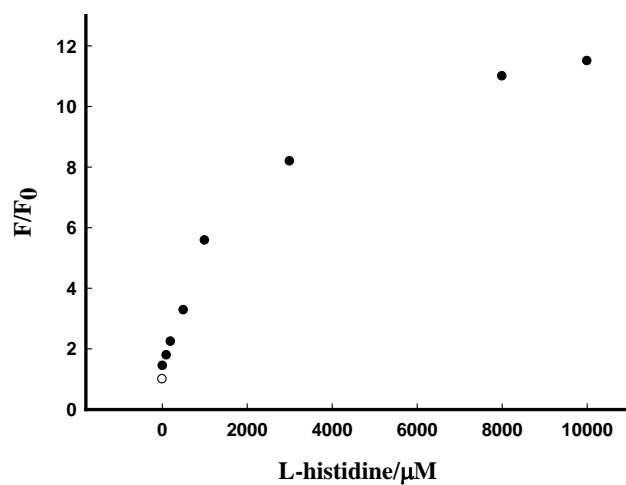

**Figure S11.** Change in fluorescence intensity based on L-histidine concentration in cell lysate samples.

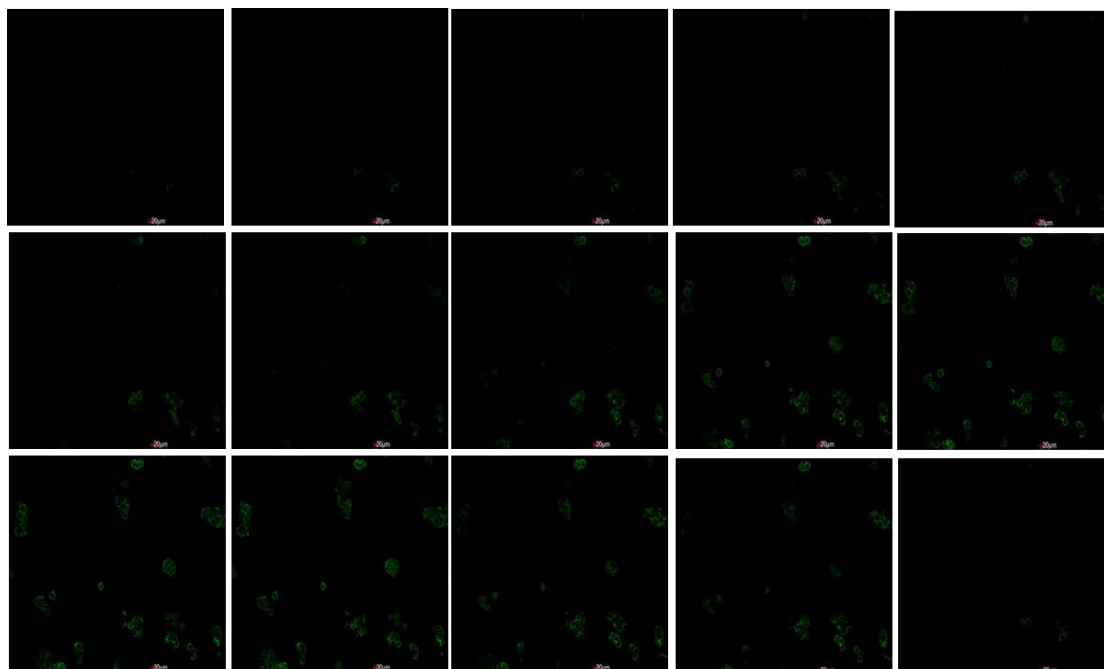

**Figure S12.** Z-stack images of cells with L-histidine,  $K^+$  and active  $G_4$ -L-histidine. The green channel is FAM fluorescence from activated  $G_4$ -L-histidine, Scale bar = 20  $\mu m$ .

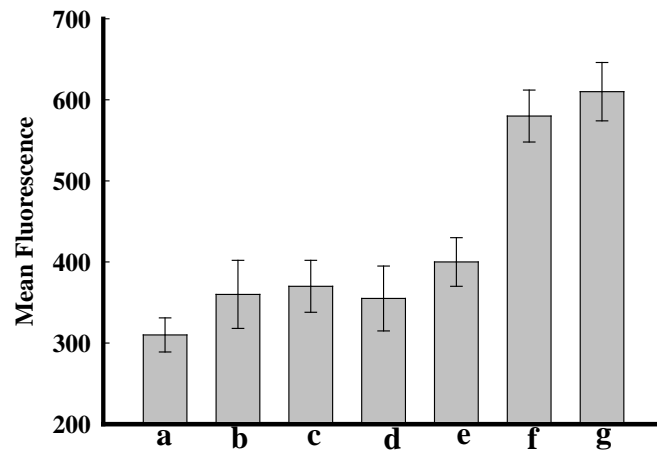

**Figure S13.** Flow cytometric quantification of cell associated fluorescence Cells a) active  $G_{4-L}$ -histidine. b) L-histidine and active  $G_{4-L}$ -histidine. c)  $K^+$  and active  $G_{4-L}$ -histidine. d) L-histidine,  $K^+$  and inactive  $G_{4-L}$ -histidine-R. e) random  $G_{4-ATP}$ -R. f) L-histidine,  $K^+$  and active  $G_{4-L}$ -histidine. g) active  $G_{4-ATP}$  were measured.

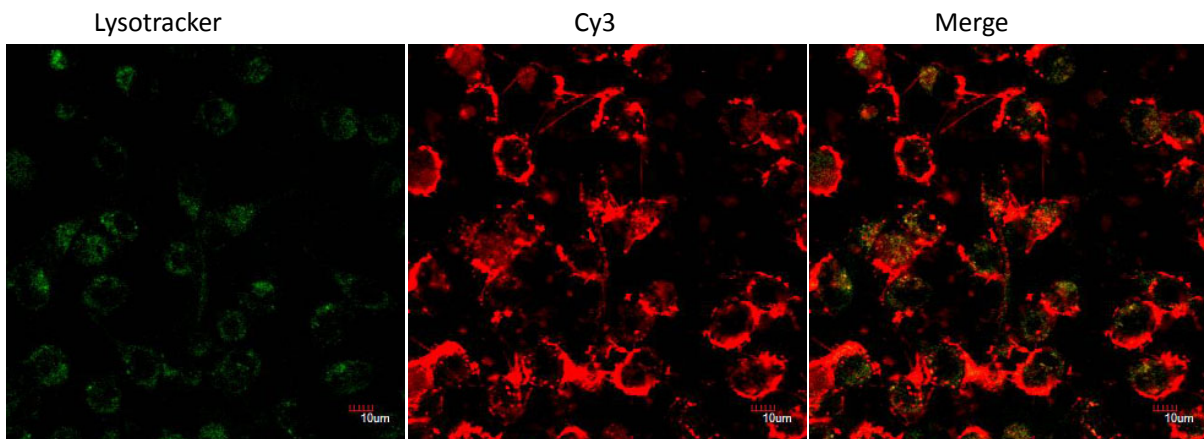

**Figure S14.** Co-localization assay of  $G_{4-ATP}$  with Lysotracker. Left panels are fluorescence from Lysotracker Green staining, middle panels are Cy3 fluorescence from the  $G_{4-ATP}$  probe, and right panels are the overlay of Cy3 and Lysotracker Green fluorescence. Scale bars: 10  $\mu$ m.

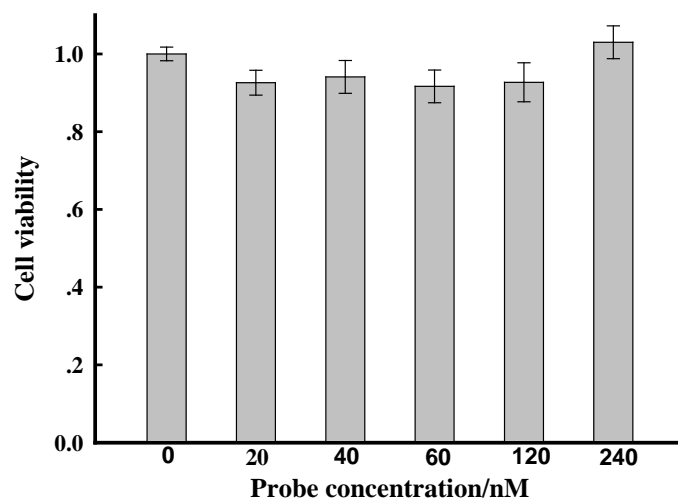

**Figure S15.** Cytotoxicity assay of MCF-7 cells treated with G<sub>4</sub> DNA dendrimers.

**References:**

(S1) Lu, L.M.; Zhang, X. B.; Kong, R. M.; Yang, B.; Tan, W. H. A Ligation-Triggered DNAzyme Cascade for Amplified Fluorescence Detection of Biological Small Molecules with Zero-Background Signal. *J. Am. Chem. Soc.* 2011, 133, 11686-11691.

(S2) Zhou, T.; Chen, P.; Niu, L.; Jin, J.; Liang, D. H.; Li, Z. B.; Yang, Z. Q.; Liu, D. S. pH-Responsive Size-Tunable Self-Assembled DNA Dendrimers. *Angew. Chem. Int. Ed.* 2012, 124, 11433-11436.
